# Supplementary material for: Forecasting Hurricane-forced Significant Wave Heights using the Long Short-Term Memory Network in the Caribbean Sea
Source: Copernicus journal article supplement (doi:10.5194/os-2021-84), 2021-09-08
Supplement: Supplementary file 1 [file os-2021-84-supplement.pdf]

1

### Supporting Information

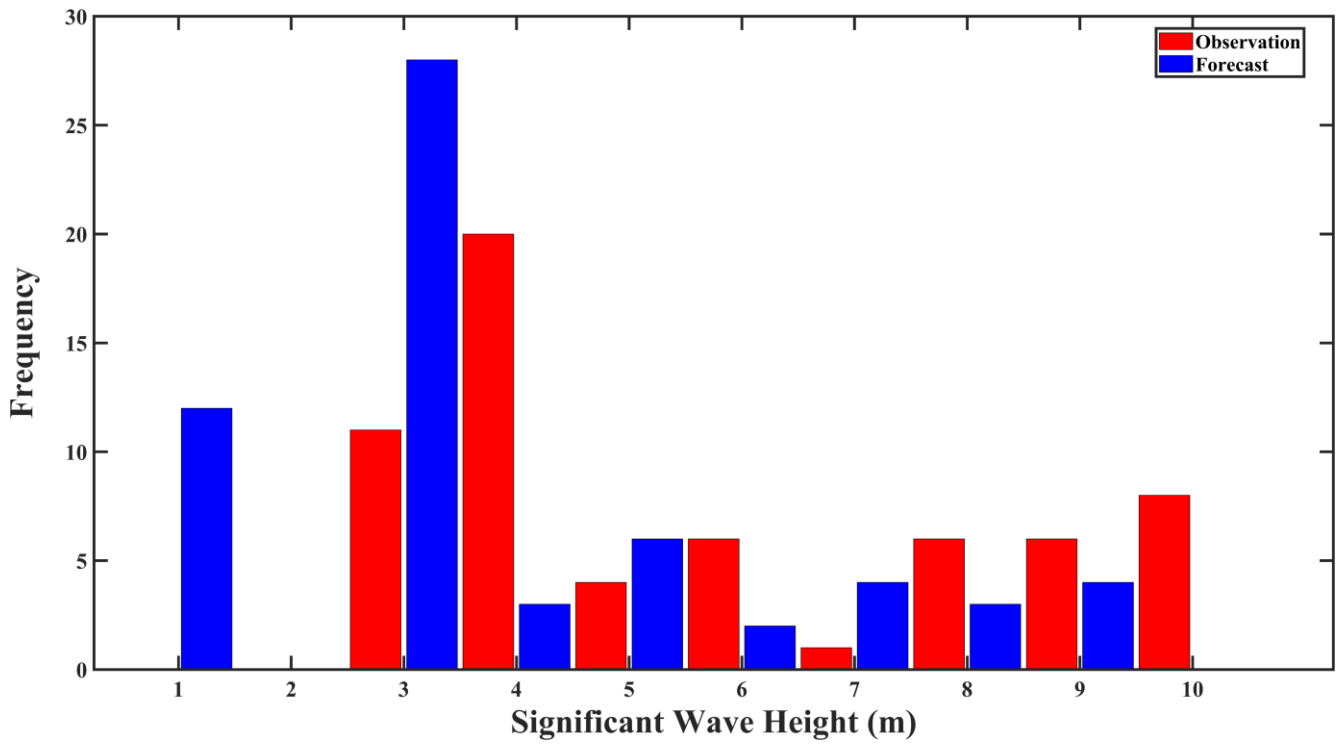

2

3 Figure S1. Histograms of Hurricane Dorian observed (blue) vs forecasted (red) SWH (m) at the 9-hour forecast horizon.

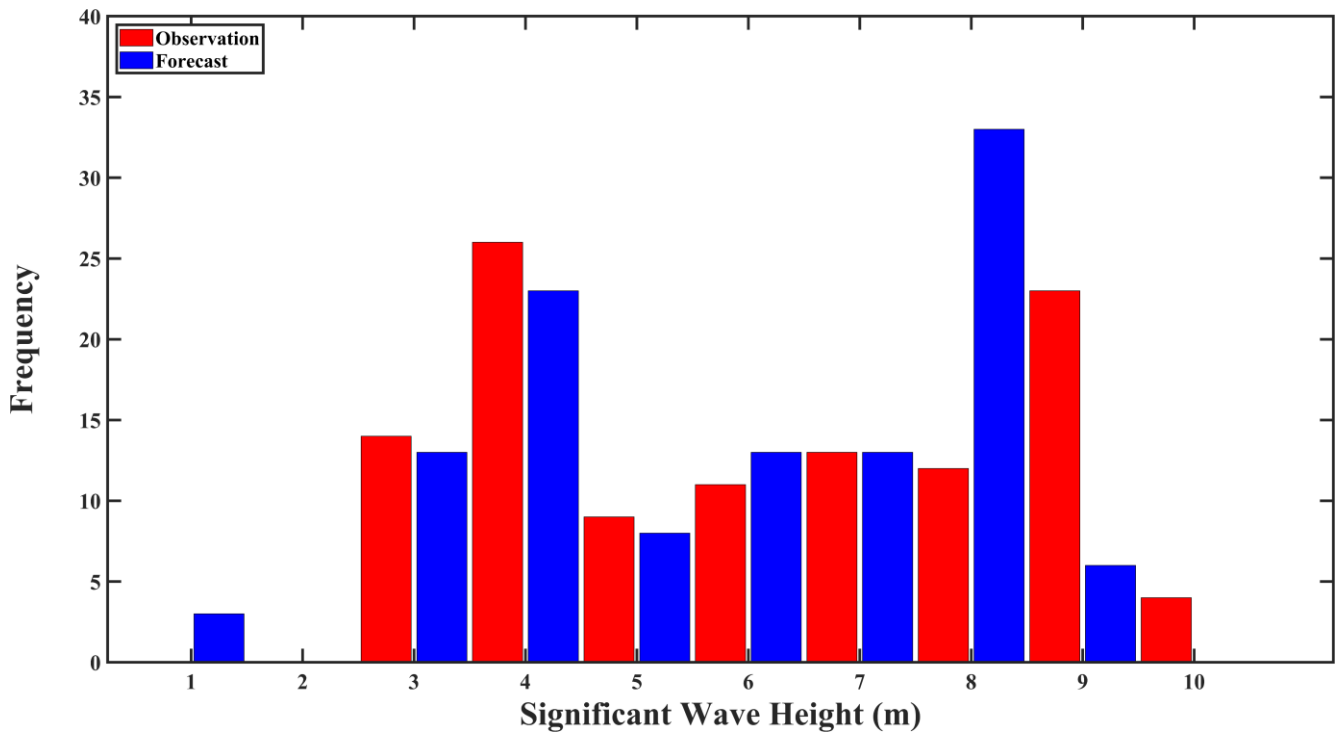

4

5 Figure S2. Same as Figure S1, but for Hurricane Sandy.

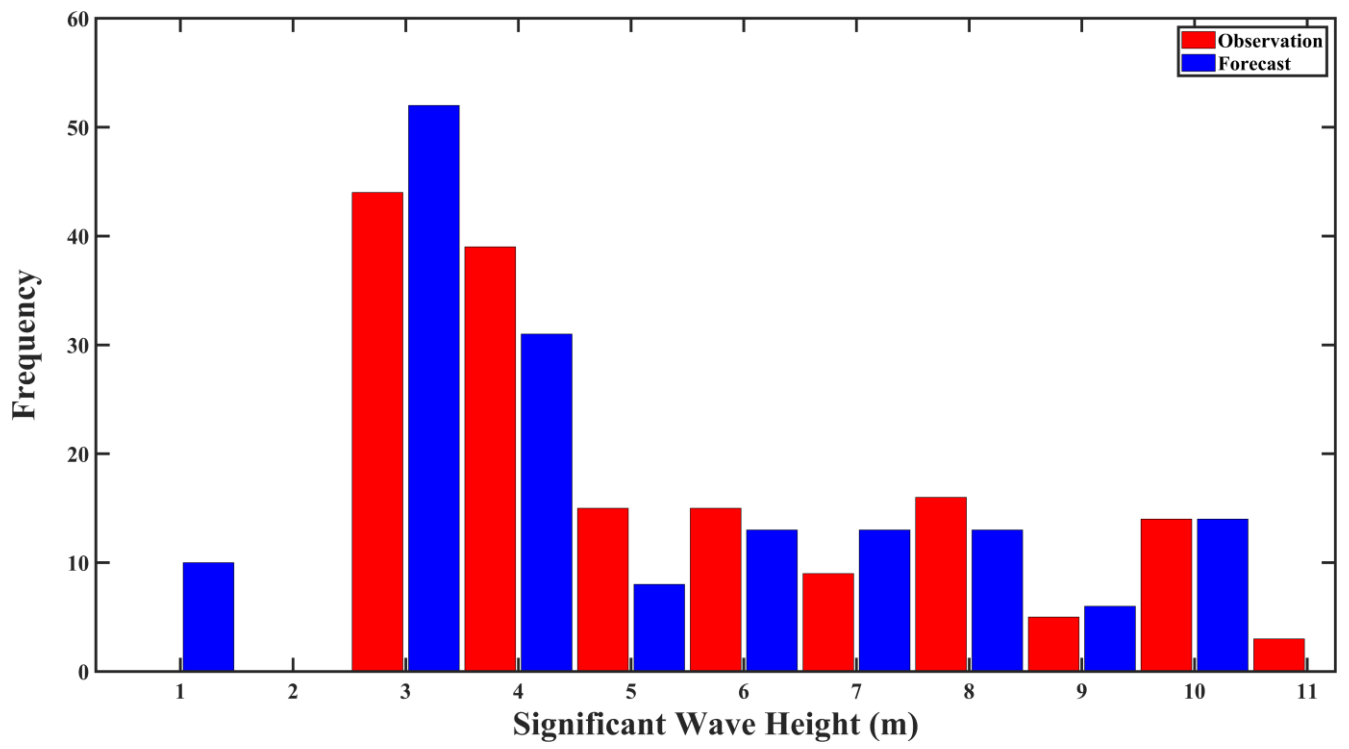

6

7 Figure S3. Same as Figure S1, but for Hurricane Igor.
